# Supplementary material for: Maximum heat transfer rate density from a rotating multiscale array of cylinders
Source: Royal Society of Chemistry journal article supplement (doi:10.1039/d3nr03885h), 2011-07-14
Supplement: d3nr03885h1.pdf [file d3nr03885h1.pdf]

**Multifunctional actuators integrated with the function of self-powered  
temperature sensing made with  $\text{Ti}_3\text{C}_2\text{T}_x$ -bamboo nanofibers composites**

Kaihuai Yang<sup>1,\*</sup>, Junjie Lin<sup>1</sup>, Congchun Fu<sup>1</sup>, Jing Guo<sup>2</sup>, Jiahao Zhou<sup>2</sup>, Fengliang Jiao<sup>2</sup>,  
Qiaohang Guo<sup>2</sup>, Peidi Zhou<sup>3,\*</sup> and Mingcen Weng<sup>2,\*</sup>

<sup>1</sup> School of Mechanical and Intelligent Manufacturing, Fujian Chuanzheng  
Communications College, Fuzhou, Fujian 350007, China

<sup>2</sup> School of Materials Science and Engineering, Fujian Provincial Key Laboratory of  
Advanced Materials Processing and Application, Key Laboratory of Polymer Materials  
and Products of Universities in Fujian, Fujian University of Technology, Fuzhou, Fujian  
350118, China

<sup>3</sup> Institute of Smart Marine and Engineering, Fujian University of Technology, Fuzhou,  
Fujian, 350118, China

**\*Corresponding authors:** ykh1347@sina.com, zhoupd@fjut.edu.cn,  
wengmc@fjut.edu.cn

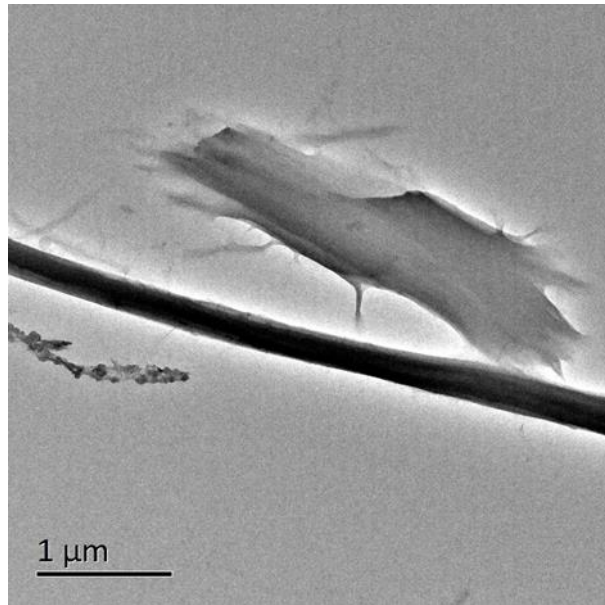

**Fig. S1** TEM image of the bamboo nanofiber.

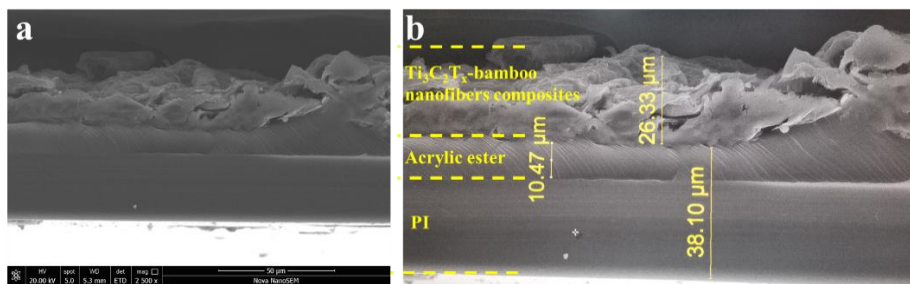

**Fig. S2** (a) Cross-sectional SEM image of  $\text{Ti}_3\text{C}_2\text{T}_x$ -bamboo nanofiber/PI actuator. (b) Thickness measurement SEM image of  $\text{Ti}_3\text{C}_2\text{T}_x$ -bamboo nanofiber/PI actuator.

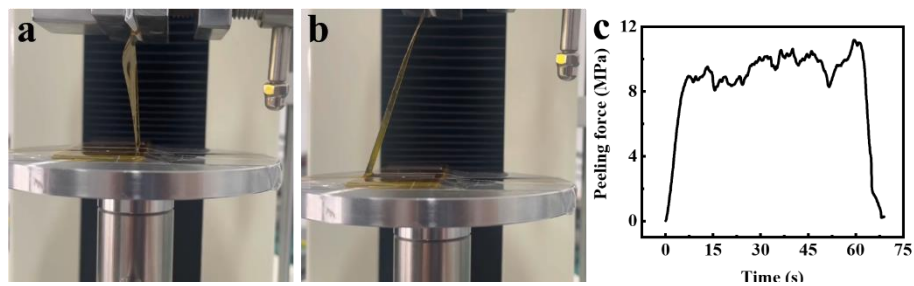

**Fig. S3** Optical photos of the  $\text{Ti}_3\text{C}_2\text{T}_x$ -bamboo nanofiber/PI actuator peeling experiment at the beginning (a) and at the end (b). (c) Peeling force of the  $\text{Ti}_3\text{C}_2\text{T}_x$  bamboo nanofiber/PI actuator.

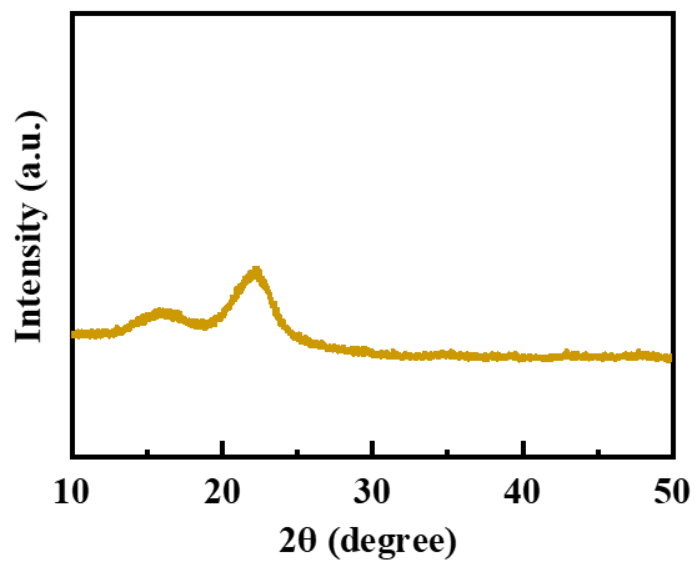

Fig. S4 XRD pattern of the bamboo nanofibers.

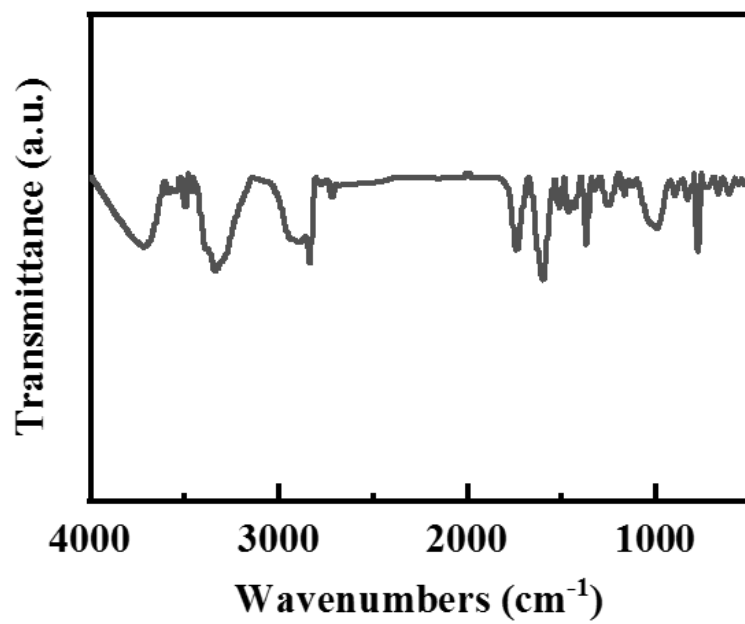

Fig. S5 FTIR spectrum of the bamboo nanofibers.

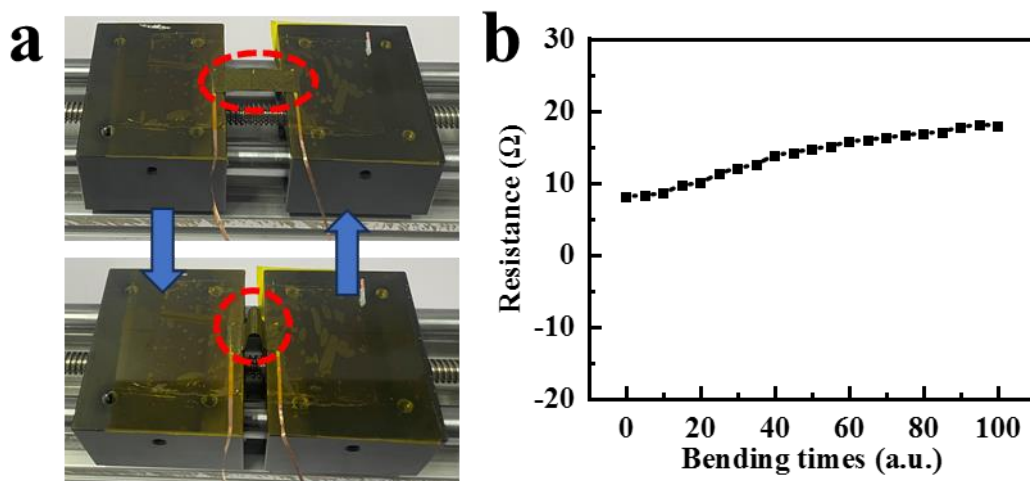

**Fig. S6** Mechanical stability of  $\text{Ti}_3\text{C}_2\text{T}_x$ -bamboo nanofibers composites. (a) Optical photos of  $\text{Ti}_3\text{C}_2\text{T}_x$ -bamboo nanofibers composites in cyclic stability test. (b) Resistance of  $\text{Ti}_3\text{C}_2\text{T}_x$ -bamboo nanofibers composites in cycling test.

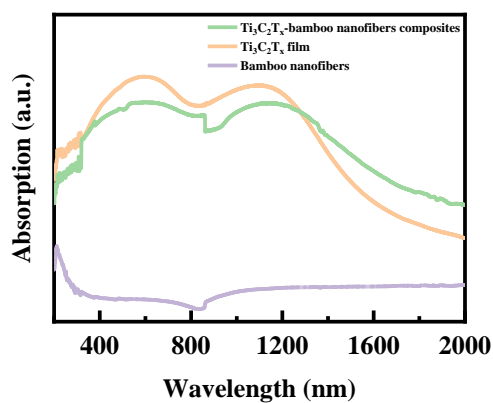

**Fig. S7** UV-vis-NIR absorption spectra of bamboo nanofibers,  $\text{Ti}_3\text{C}_2\text{T}_x$  film and  $\text{Ti}_3\text{C}_2\text{T}_x$ -bamboo nanofibers composites.

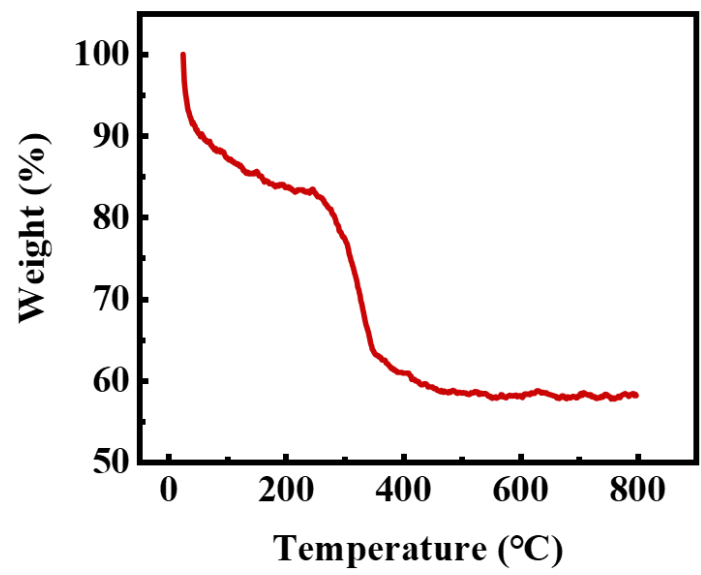

**Fig. S8** TGA curve of  $\text{Ti}_3\text{C}_2\text{T}_x$ -bamboo nanofibers composites.

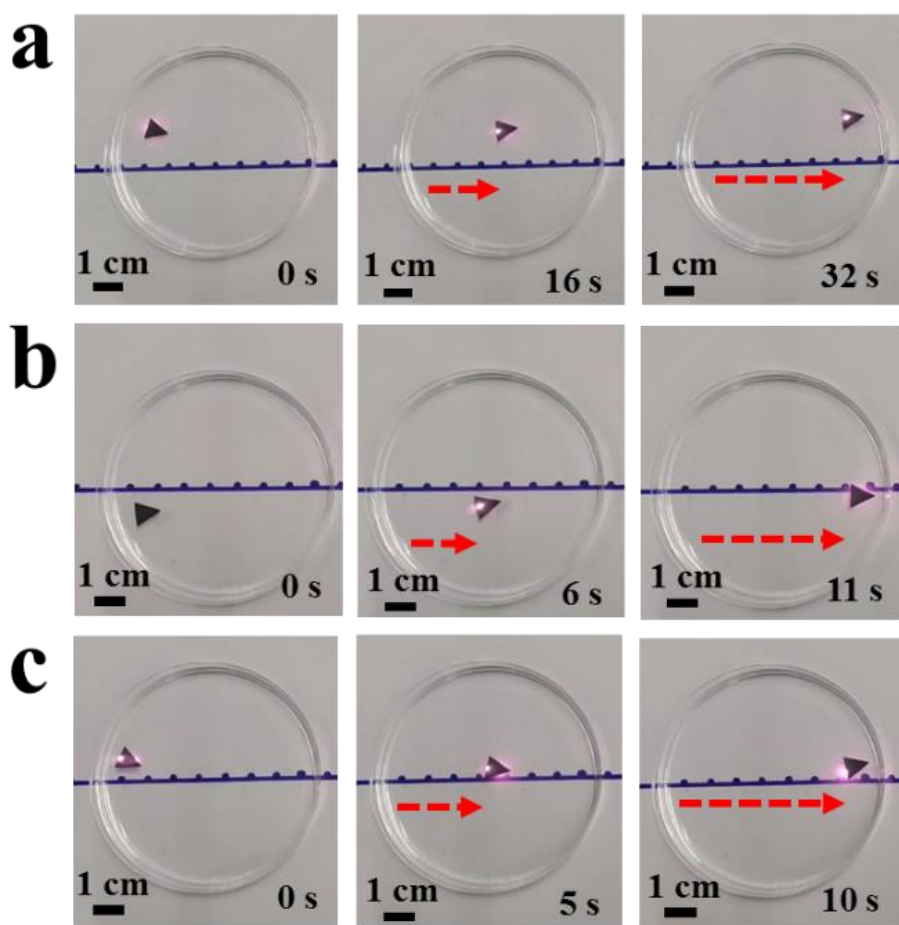

**Fig. S9** Experiments on the effect of NIR light power intensity on  $\text{Ti}_3\text{C}_2\text{T}_x$ -bamboo nanofiber/PI light-driven floating actuator. (a) Optical photos of the locomotion of  $\text{Ti}_3\text{C}_2\text{T}_x$ -bamboo nanofiber/PI light-driven floating actuator under NIR light with  $40 \text{ mW cm}^{-2}$  and corresponding infrared thermal images. (b) Optical photos of the locomotion of  $\text{Ti}_3\text{C}_2\text{T}_x$ -bamboo nanofiber/PI light-driven floating actuator under NIR light with  $80 \text{ mW cm}^{-2}$  and corresponding infrared thermal images. (c) Optical photos of the locomotion of  $\text{Ti}_3\text{C}_2\text{T}_x$ -bamboo nanofiber/PI light-driven floating actuator under NIR light with  $100 \text{ mW cm}^{-2}$  and corresponding infrared thermal images.

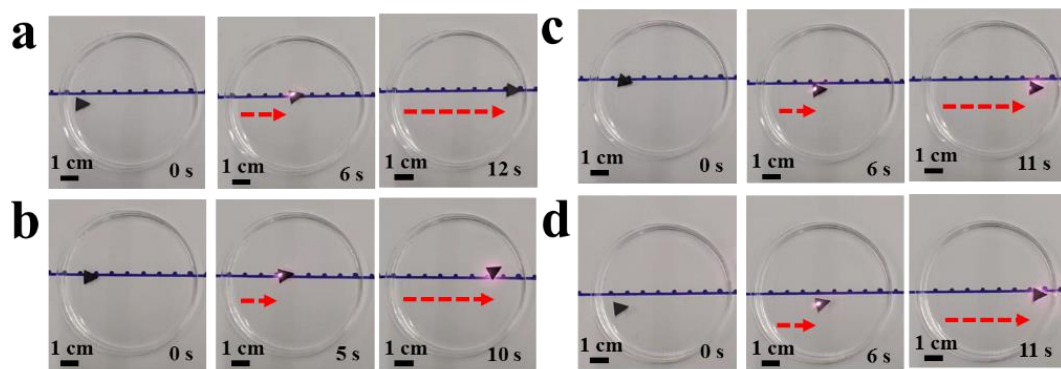

**Fig. S10** The influence tests of solution properties on the locomotion speed of  $\text{Ti}_3\text{C}_2\text{T}_x$ -bamboo nanofiber/PI light-driven floating actuator. (a) Optical photos of the locomotion of  $\text{Ti}_3\text{C}_2\text{T}_x$ -bamboo nanofiber/PI light-driven floating actuator in acidic solution ( $1 \text{ mol L}^{-1} \text{ HCl}$ ) and corresponding infrared thermal images. (b) Optical photos of the locomotion of  $\text{Ti}_3\text{C}_2\text{T}_x$ -bamboo nanofiber/PI light-driven floating actuator in alkaline solution ( $1 \text{ mol L}^{-1} \text{ NaOH}$ ) and corresponding infrared thermal images. (c) Optical photos of the locomotion of  $\text{Ti}_3\text{C}_2\text{T}_x$ -bamboo nanofiber/PI light-driven floating actuator in salt solution ( $1 \text{ mol L}^{-1} \text{ NaCl}$ ) and corresponding infrared thermal images. (d) Optical photos of the locomotion of  $\text{Ti}_3\text{C}_2\text{T}_x$ -bamboo nanofiber/PI light-driven floating actuator in deionized water and corresponding infrared thermal images.

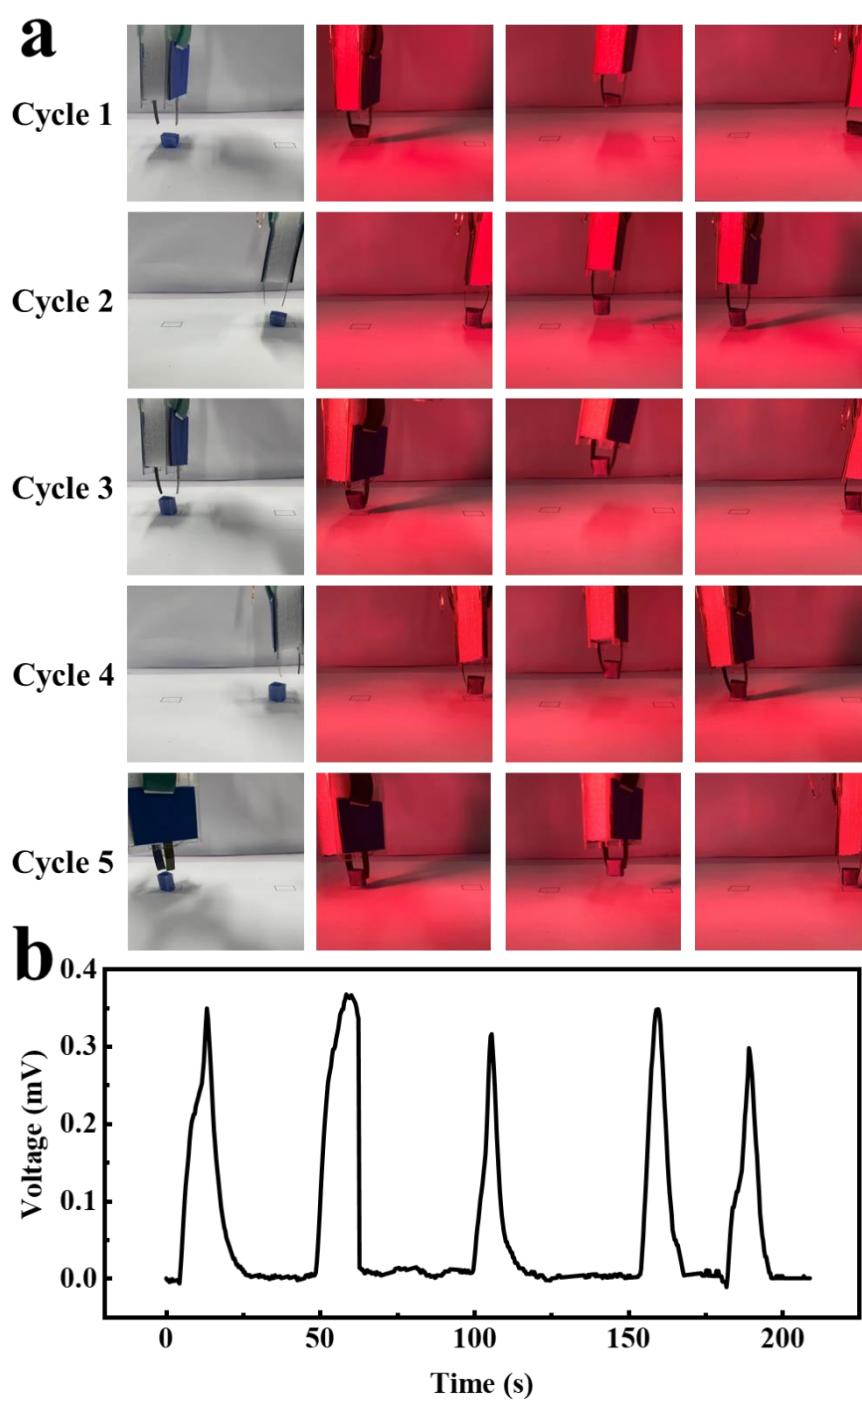

**Fig. S11** Cyclic stability test of the multifunctional gripper. (a) Optical photos of the multifunctional gripper under a five-times light-driven cycles. (b) Output voltage of the multifunctional gripper under a five-times light-driven cycles.
